# Supplementary material for: Solvent-free conversion of glycerol to solketal catalysed by activated carbons functionalised with acid groups
Source: Royal Society of Chemistry journal article supplement (doi:10.1039/c4cy00181h), 2014-01-01
Supplement: c4cy00181h1.pdf [file c4cy00181h1.pdf]

## Solvent-free conversion of glycerol to solketal catalysed by activated carbons functionalised with acid groups

Raphael Rodrigues, Maraisa Gonçalves, Dalmo Mandelli, Paolo P. Pescarmona\* and Wagner A. Carvalho\*

### Supporting Information

**Table S1.** Acetalisation of acetone with glycerol at room temperature over the pyrolysed AC-N-15M and AC-S-18M catalysts (glycerol:acetone molar ratio of 1:1, 2.7 wt% of catalyst, 6 h, T = 298K). The pyrolysis consisted of a thermal treatment at 923 K for 1 h under N<sub>2</sub>-flow (100 mL min<sup>-1</sup>).

|               | Total acid sites <sup>a</sup> (mmol g <sup>-1</sup> ) | Stronger acid sites <sup>a</sup> (mmol g <sup>-1</sup> ) | Glycerol Conversion (%) | Solketal Selectivity (%) | 6MR Selectivity (%) |
|---------------|-------------------------------------------------------|----------------------------------------------------------|-------------------------|--------------------------|---------------------|
| AC-N-15M-923K | 0.13                                                  | 0.008                                                    | 1                       | 74                       | 26                  |
| AC-S-18M-923K | 0.07                                                  | 0.003                                                    | 0.4                     | 76                       | 24                  |

<sup>a</sup> Determined by Boehm titration (see main text for details).
